# Supplementary material for: Going beyond cell clustering and feature aggregation: Is there single cell level information in single-cell ATAC-seq data?
Source: PubMed Central journal article supplement — bioRxiv. 2024 Dec 9:2024.12.04.626927. Preprint. [Version 1] doi: 10.1101/2024.12.04.626927 (PMC11661094; doi:10.1101/2024.12.04.626927), 2024-12-09
Supplement: media-1.pdf [file media-1.pdf]

## Supplementary information

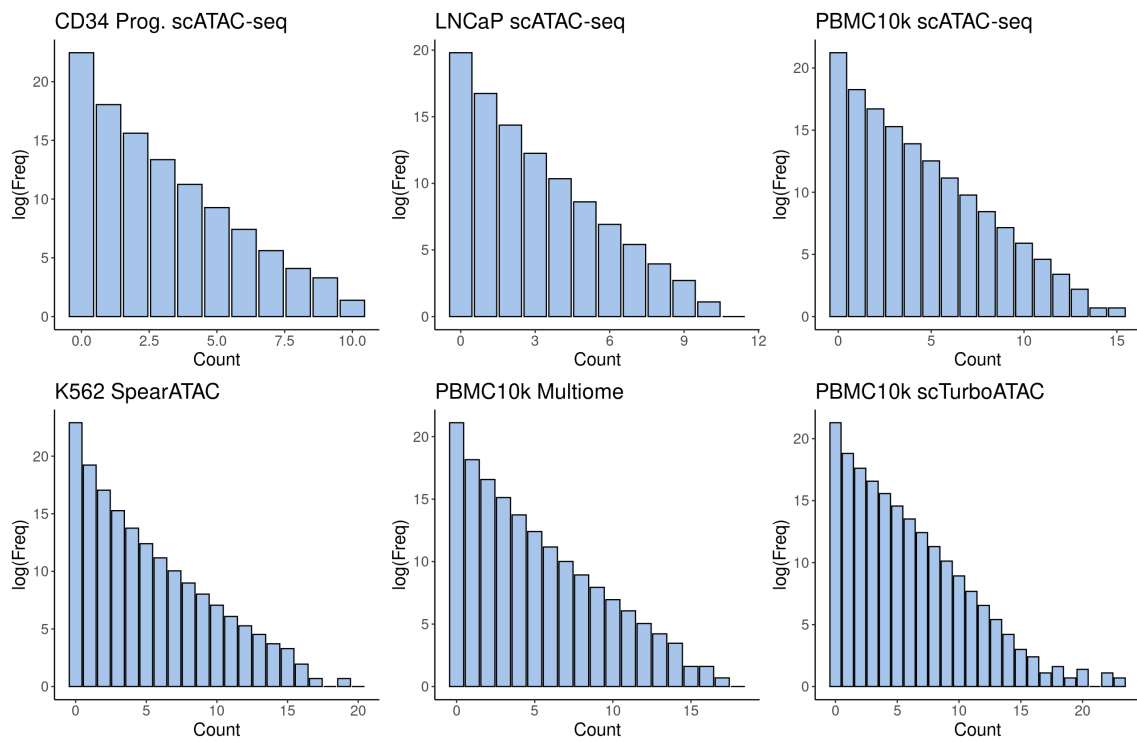

Figure S1: Histogram of paired-insertion counts (PIC) for all datasets analysed.

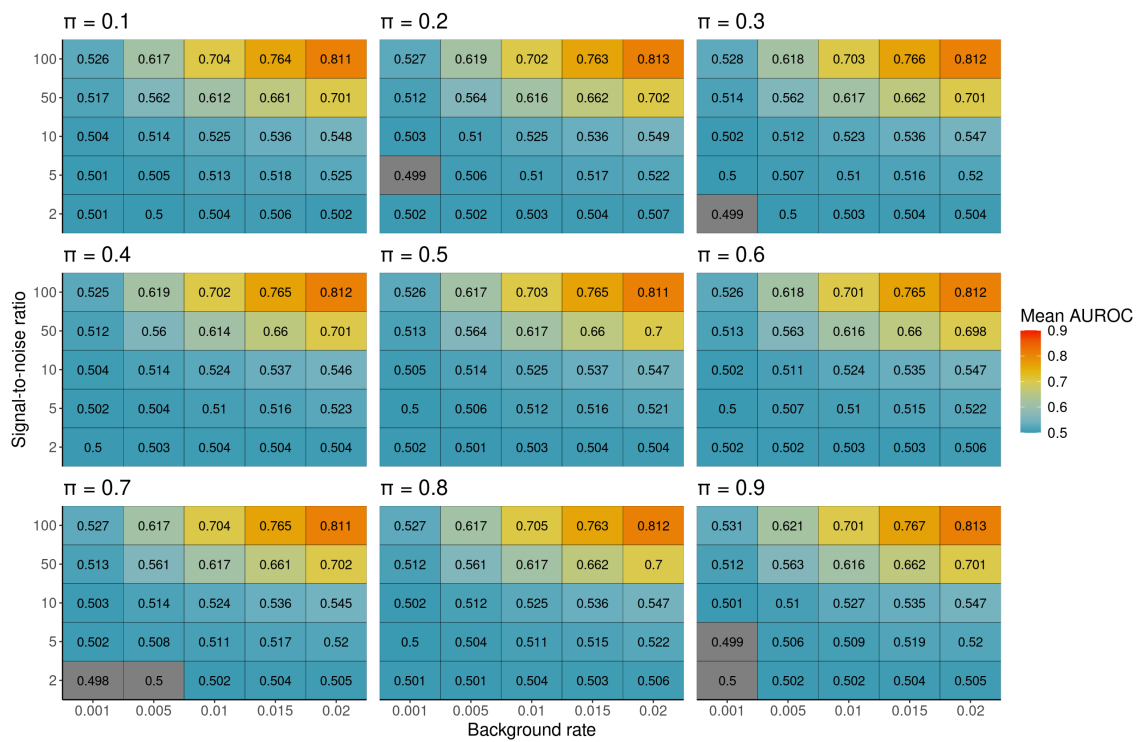

Figure S2: Simulations with varying  $\pi$ .

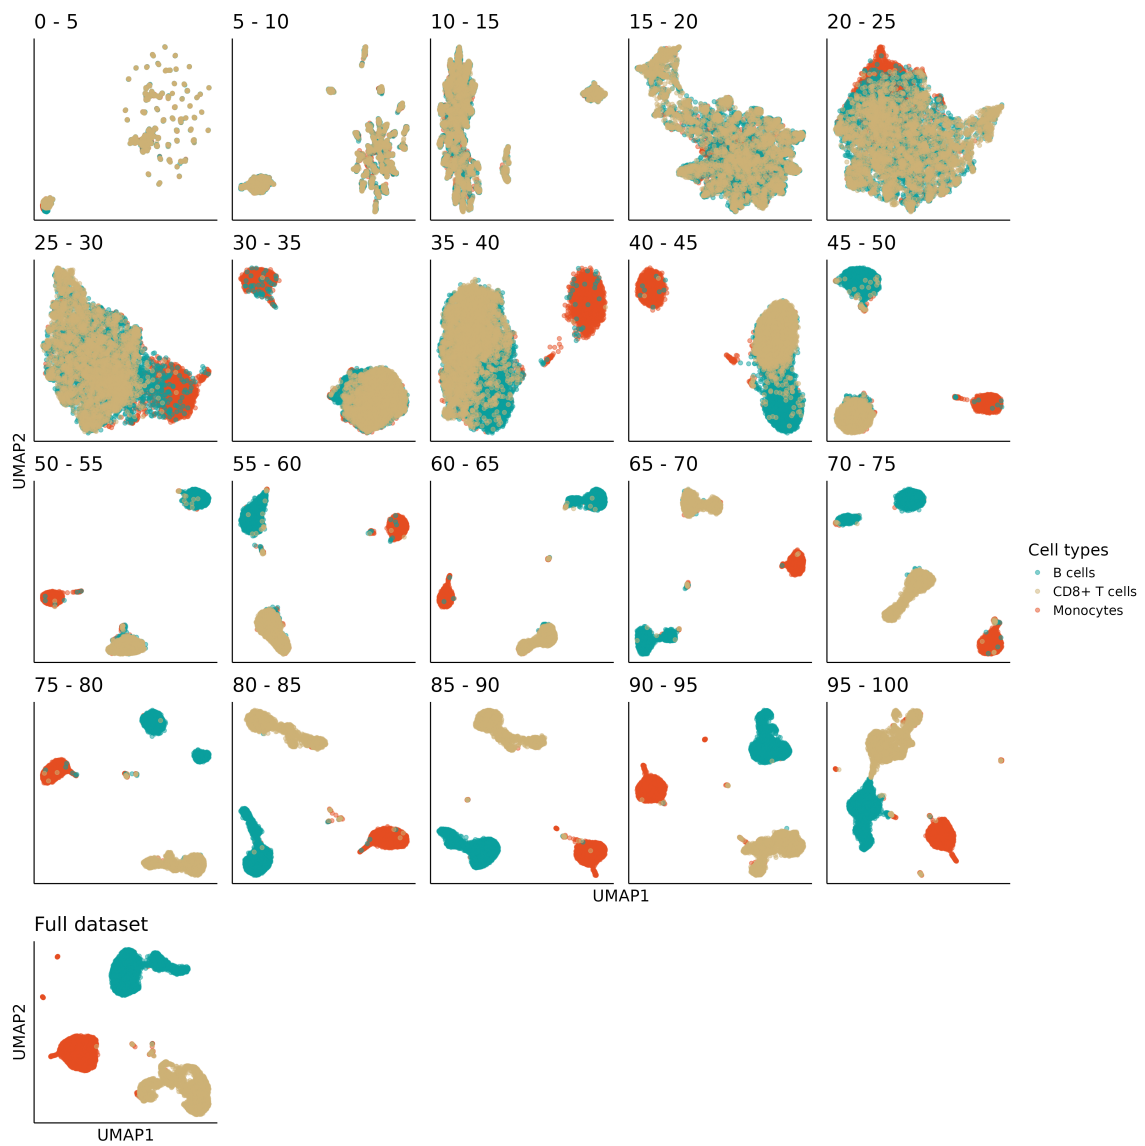

Figure S3: UMAPs of clustering with varying peak quantiles.
